# Supplementary material for: Reconstruction of the Diaminopimelic Acid Pathway to Promote L-lysine Production in Corynebacterium glutamicum
Source: MDPI journal article supplement (doi:10.3390/ijms22169065), 2021-08-23
Supplement: s1 [file s1]

# **Reconstruction of the diaminopimelic acid pathway to promote L-lysine production in *Corynebacterium glutamicum***

**Ning Liu<sup>1</sup>, Ting-Ting Zhang<sup>1</sup>, Zhi-Ming Rao<sup>1,2,\*</sup>, Wei-Guo Zhang<sup>1</sup>, Jian-Zhong Xu<sup>1,\*</sup>**

<sup>1</sup> The Key Laboratory of Industrial Biotechnology, Ministry of Education, School of Biotechnology, Jiangnan University, 1800<sup>#</sup> Lihu Road, WuXi 214122, People's Republic of China; 6190206010@stu.jiangnan.edu.cn (N.L.); ln576678072@163.com (T.-T.Z.); zhangwg@jiangnan.edu.cn (W.-G.Z.)

<sup>2</sup> National Engineering Laboratory for Cereal Fermentation Technology (NELCF), Jiangnan University, 1800<sup>#</sup> Lihu Road, Wuxi, 214122, People's Republic of China

\* Correspondence: xujianzhong@jiangnan.edu.cn (J.-Z.X.); raozhm@jiangnan.edu.cn (Z.-M.R.); Tel./Fax: +86-510-85329312 (J.-Z.X.)

## **The build processes of recombinant plasmids**

### **The plasmid pEC-XK99E-*ddh* construction**

The nucleotide sequences of the gene *ddh* from *C. glutamicum* XQ-5 with two restriction sites (i.e., *EcoRI* and *XbaI*) were amplified by PCR, and then ligated with plasmid pEC-XK99E. The resulted plasmid was designated as pEC-XK99E-*ddh*.

### **The plasmid pK18*mobsacB*- $\Delta$ *amtR* construction**

The homology arm sequences of the gene *amtR* from *C. glutamicum* XQ-5 with two restriction sites (i.e., *EcoRI* and *XbaI*) were amplified by fusion PCR, and then ligated with plasmid pK18*mobsacB*. The resulted plasmid was designated as pK18*mobsacB*- $\Delta$ *amtR*.

### **The plasmid pK18*mobsacB*- $\Delta$ *dapD* construction**

The homology arm sequences of the gene *dapD* from *C. glutamicum* XQ-5 with two restriction sites (i.e., *SmaI* and *HindIII*) were amplified by fusion PCR, and then ligated with plasmid pK18*mobsacB*. The resulted plasmid was designated as pK18*mobsacB*- $\Delta$ *dapD*.

### **The plasmid pK18*mobsacB*- $\Delta$ *ddh* construction**

The homology arm sequences of the gene *ddh* from *C. glutamicum* XQ-5 with two restriction sites (i.e., *EcoRI* and *XbaI*) were amplified by fusion PCR, and then ligated with plasmid pK18*mobsacB*.

The resulted plasmid was designated as pK18*mobsacB*- $\Delta$ *ddh*.

### **The plasmid pK18*mobsacB*-T1, T2, T3, T4, T5, T6 construction**

The T1 terminator and the left homologous arm of gene *dapD* were designed on the same primer, and then the gene *dapD* homologous arm sequences were amplified by fusion PCR, and then ligated

with plasmid pK18*mobsacB*. The resulted plasmid was designated as pK18*mobsacB*-T1. Construction of plasmid pK18*mobsacB*- T2, T3, T4, T5, T6 were similar to that of plasmid pK18*mobsacB*-T1.

### **The procedures of recombinant strain constructions**

Construction of XQ-5-2 ( $\Delta$ *amtR*), XQ-5-4 ( $\Delta$ *dapD*), XQ-5-5 ( $\Delta$ *ddh*) and XQ-5-6 ( $\Delta$ *amtR* $\Delta$ *dapD*)

The plasmid pK18*mobsacB*- $\Delta$ *amtR*, pK18*mobsacB*- $\Delta$ *ddh* and pK18*mobsacB*- $\Delta$ *dapD* were electroporated into *C. glutamicum* XQ-5, and then the positive transformants were screened with 25 $\mu$ g/mL concentration of kanamycin in LBH medium. The final positive transformants were obtained by eliminating the plasmids according to the sucrose lethal principle. The deletion of genes *amtR*, *ddh* and *dapD* were analyzed by PCR, and strain XQ-5-2, XQ-5-4 and XQ-5-5 were obtained. The strain XQ-5-6 was based on strain XQ-5-2 by deleting the gene *dapD* through the same steps.

Construction of XQ-5-1 (XQ-5/pEC-*ddh*), XQ-5-3 ( $\Delta$ *amtR*/pEC-*ddh*), XQ-5-7 ( $\Delta$ *dapD*/pEC-*ddh*) and XQ-5-8 ( $\Delta$ *amtR* $\Delta$ *dapD*/pEC-*ddh*)

The plasmid pEC-XK99E-*ddh* was transformed into XQ-5, XQ-5-2, XQ-5-4 and XQ-5-6, respectively, and then resulting in XQ-5-1, XQ-5-3, XQ-5-7 and XQ-5-8, respectively.

Construction of XQ-5-W1, XQ-5-W2, XQ-5-W3, XQ-5-W4, XQ-5-W5 and XQ-5-W6.

The plasmid pK18*mobsacB*-T1, pK18*mobsacB*-T2, pK18*mobsacB*-T3, pK18*mobsacB*-T4, pK18*mobsacB*-T5 and pK18*mobsacB*-T6 were electroporated into strain XQ-5-3 ( $\Delta$ *amtR*/pEC-*ddh*), and then the positive transformants were screened with 25 $\mu$ g/mL concentration of kanamycin in LBH medium. The final positive transformants were obtained by eliminating the plasmids according to the sucrose lethal principle. The strain XQ-5-W1, XQ-5-W2, XQ-5-W3, XQ-5-W4, XQ-5-W5 and XQ-5-W6 were obtained by PCR analysis.

**Table S1** The Sequence of Terminators

| name | terminator sequence (5'-3')                | strength |
|------|--------------------------------------------|----------|
| T1   | CCAATTATTGAAGCGGCTAACGCCGCTTTTTTTGTTTCTGGT | 67.43    |
| T2   | CCAATTATTGAACACCCTAACGGGTGTTTTTTTGTCTGGT   | 128.86   |
| T3   | GACGAACAATAAGGCCTCCCTAACGGGGGGCCTTTTTTATT  | 177.94   |
| T4   | CTCGGTACCAAATTCCAGAAAAGAGACGCTGAAAAGCGTC   | 239.91   |
| T5   | CTCGGTACCAAAAAAAAAAAAAAAAAAGACACTGAAAAGCGT | 309.20   |
| T6   | GGAAACACAGAAAAAAGCCCGCACCTGACAGTGCGGGCT    | 382.13   |

**Table S2** The oligonucleotides used in this study

| primer                         | sequence (5'-3')                                                    | restriction sites |
|--------------------------------|---------------------------------------------------------------------|-------------------|
| <i>amtR</i> -L-F               | CCGGAATTCGAATCACTCGTGCTTCACCCC                                      | <i>EcoRI</i>      |
| <i>amtR</i> -L-R               | TTGGCCTATTGATCTCAAGAGATTGTAGCCAGTA                                  |                   |
| <i>amtR</i> -R-F               | AGATCAATAGGCCAACTCGCCACCGAAATCGT                                    |                   |
| <i>amtR</i> -R-R               | TGCTCTAGAGTGCAGCCTGGTGGATCCATT                                      | <i>XbaI</i>       |
| <i>dapD</i> -L-F               | TCCCCCGGGGAACCGTGGATTCTTCGCT                                        | <i>SmaI</i>       |
| <i>dapD</i> -L-R               | GAATAATTTCTATCGGCCTATCAGTTCAAGT                                     |                   |
| <i>dapD</i> -R-F               | TAGAAATTATTCCTTAGCCTGGATCCGATC                                      |                   |
| <i>dapD</i> -R-R               | CCCAAGCTTCTACCTCGCCTCCATCATGAT                                      | <i>HindIII</i>    |
| <i>ddh</i> -L-F                | CCGGAATTCCTCACGGATGCTGTTGGGCA                                       | <i>EcoRI</i>      |
| <i>ddh</i> -L-R                | TTGTAATCCTCCAAAATTGTGGTGGCACTGTC                                    |                   |
| <i>ddh</i> -R-F                | TTTGGAGGATTACAATCGAGGGGCAAGGAAACA                                   |                   |
| <i>ddh</i> -R-R                | TGCTCTAGACGTCACAAACCCATCTTTAG                                       | <i>XbaI</i>       |
| pEC- <i>ddh</i> -F             | CCGGAATTCGCTTCGCTTTCGGTCCCTGAT                                      | <i>EcoRI</i>      |
| pEC- <i>ddh</i> -R             | CTAGTCTAGAGTCACGCCTGTCTGGTTTCCT                                     | <i>XbaI</i>       |
| <i>dapD</i> <sup>W1</sup> -L-F | CCGGAATTCGCTTTCCTCATCATTGGT                                         | <i>EcoRI</i>      |
| <i>dapD</i> <sup>W1</sup> -L-R | ACCAGAAACAAAAAAGCGGCGTTAGCCGCTTC<br>AATAATTGGCCTATCAGTTCAAGTCGGAAGG |                   |
| <i>dapD</i> <sup>W1</sup> -R-F | AGCGGCTAACGCCGCTTTTTTTTGTCTTCTGGTCCG<br>ATAGAAATTATTCTGGACGTC       |                   |
| <i>dapD</i> <sup>W1</sup> -R-R | CCCAAGCCTGTCCGTTGGTGAAAGCGAT                                        | <i>HindIII</i>    |
| <i>dapD</i> <sup>W2</sup> -L-F | CCGGAATTCGCTTTCCTCATCATTGGT                                         | <i>EcoRI</i>      |
| <i>dapD</i> <sup>W2</sup> -L-R | CCAGAAACAAAAAACACCCGTTAGGGTGTTCA<br>ATAATTGGCCTATCAGTTCAAGTCGGAAGG  |                   |
| <i>dapD</i> <sup>W2</sup> -R-F | ACACCCTAACGGGTGTTTTTTTGTCTTCTGGTCCGA<br>TAGAAATTATTCTGGACGTC        |                   |
| <i>dapD</i> <sup>W2</sup> -R-R | CCCAAGCCTGTCCGTTGGTGAAAGCGAT                                        | <i>HindIII</i>    |
| <i>dapD</i> <sup>W3</sup> -L-F | CCGGAATTCGCTTTCCTCATCATTGGT                                         | <i>EcoRI</i>      |
| <i>dapD</i> <sup>W3</sup> -L-R | AATAAAAAAGGCCCCCCGTTAGGGAGGCCTTATTG<br>TTCGTCCCTATCAGTTCAAGTCGGAAGG |                   |
| <i>dapD</i> <sup>W3</sup> -R-F | AGGCCTCCCTAACGGGGGGCCTTTTTTATTCCGATA<br>GAAATTATTCTGGACGTC          |                   |
| <i>dapD</i> <sup>W3</sup> -R-R | CCCAAGCCTGTCCGTTGGTGAAAGCGAT                                        | <i>HindIII</i>    |
| <i>dapD</i> <sup>W4</sup> -L-F | CCGGAATTCGCTTTCCTCATCATTGGT                                         | <i>EcoRI</i>      |
| <i>dapD</i> <sup>W4</sup> -L-R | GACGCTTTTCAGCGTCTCTTTTCTGGAATTTGGTAC<br>CGAGCCTATCAGTTCAAGTCGGAAGG  |                   |
| <i>dapD</i> <sup>W4</sup> -R-F | AATTCCAGAAAAGAGACGCTGAAAAGCGTCCCGA<br>TAGAAATTATTCTGGACGTC          |                   |
| <i>dapD</i> <sup>W4</sup> -R-R | CCCAAGCCTGTCCGTTGGTGAAAGCGAT                                        | <i>HindIII</i>    |
| <i>dapD</i> <sup>W5</sup> -L-F | CCGGAATTCGCTTTCCTCATCATTGGT                                         | <i>EcoRI</i>      |
| <i>dapD</i> <sup>W5</sup> -L-R | ACGCTTTTCAGTGCTTTTTTTTTTTTTTTGGTACCG<br>AGCCTATCAGTTCAAGTCGGAAGG    |                   |

**Refer to Table S2 (continued)**

| primer                         | sequence (5'-3')                                                | restriction sites |
|--------------------------------|-----------------------------------------------------------------|-------------------|
| <i>dapD</i> <sup>W5</sup> -R-F | AAAAAAAAAAAAAAAAAAGACACTGAAAAGCGTCCGA<br>TAGAAATTATTCTGGACGTC   |                   |
| <i>dapD</i> <sup>W5</sup> -R-R | CCCAAGCCTGTCCGTTGGTGAAAGCGAT                                    | <i>HindIII</i>    |
| <i>dapD</i> <sup>W6</sup> -L-F | CCGGAATTCCGCTTTCCTCATCATTGGT                                    | <i>EcoRI</i>      |
| <i>dapD</i> <sup>W6</sup> -L-R | GCCCGCACTGTCAGGTGCGGGCTTTTTTCTGTGTTT<br>CCCCTATCAGTTCAAGTCGGAAG |                   |
| <i>dapD</i> <sup>W6</sup> -R-F | GAAAAAAGCCCGCACCTGACAGTGCGGGCTCCGAT<br>AGAAATTATTCTGGACGTC      |                   |
| <i>dapD</i> <sup>W6</sup> -R-R | CCCAAGCCTGTCCGTTGGTGAAAGCGAT                                    | <i>HindIII</i>    |

**Table S3** Primers used for RT-PCR in this work

| primers        | sequence (5'-3')      |
|----------------|-----------------------|
| 16SRNA-F:      | ACCTGGAGAAGAAGCACCG   |
| 16SRNA-R       | TCAAGTTATGCCCCGTATCG  |
| <i>ddh</i> -F  | CGTGCTGTTCTGTGCATG    |
| <i>ddh</i> -R  | AGAACATTCCTGGATCCCAGC |
| <i>dapD</i> -F | GCCTCCTCAACAATGTCGTG  |
| <i>dapD</i> -R | CACGAAGCCCTCATGCATCA  |
